# Supplementary material for: Cross-Platform Toxicogenomics for the Prediction of Non-Genotoxic Hepatocarcinogenesis in Rat
Source: PLoS One. 2014 May 15;9(5):e97640. doi: 10.1371/journal.pone.0097640 (PMC4022579; doi:10.1371/journal.pone.0097640)
Supplement: Table S3 — Signatures for NGC vs. NC discrimination. The tables list the signatures inferred for the discrimination of non-genotoxic carcinogens and non-carcinogens for each signature type (single-platform features: mRNA, miRNA, and protein expression as well as cross-platform features: molecular interaction (MI) and pathway enrichment (PE) features). (XLS) [file pone.0097640.s013.xls]

## Sheet: mRNA
probe id	gene symbol	entrez id	description	svm	randomForest	caret_avNNet	caret_pcr	caret_bayesglm
1387022_at	Aldh1a1	24188	Retinal dehydrogenase 1	x	x	x	x	x
1374171_at	Abcc9			x	x	x	x	x
1371245_a_at				x	x	x	x	x
1371776_at				x	x	x	x	x
1370355_at	Scd1	246074	Acyl-CoA desaturase 1	x	x	x	x	x
1371089_at	Gsta5	494499	Glutathione S-transferase alpha-1	x	x	x	x	x
1369863_at				x	x	x	x	x
1368121_at	Akr7a3	26760	Aflatoxin B1 aldehyde reductase member 3	x	x	x	x	x
1370281_at	Fabp5	140868	Fatty acid-binding protein, epidermal	x	x	x	x	x
1387825_at	Ugt2b	24862	UDP-glucuronosyltransferase 2B2 precursor	x	x	x	x	x
1377015_at				x	x	x	x	x
1374883_at	Mtmr7	306490	myotubularin-related protein 7	x	x	x	x	x
1389716_at				x	x		x	x
1369698_at	Abcc3	140668	canalicular multispecific organic anion transporter 2	x	x	x	x	x
1374244_at	LOC501038	501038	uncharacterized protein LOC501038	x	x	x	x	x
1369224_at	Cdh17	117048	Cadherin-17	x	x	x	x	x
1368520_at	Apoa4			x	x		x	x
1368308_at	Myc	24577	Myc proto-oncogene protein	x	x		x	x
1387669_a_at	Ephx1	25315	Epoxide hydrolase 1	x	x		x	x
1387839_at				x	x	x	x	x
1387183_at	Crot	83842	peroxisomal carnitine O-octanoyltransferase	x	x		x	x
1368905_at				x	x		x	x
1387193_a_at	Spink3	24833	Pancreatic secretory trypsin inhibitor	x	x		x	x
1372727_at				x	x
1387006_at	Sult2a6		alcohol sulfotransferase A	x	x

## Sheet: miRNA
systematic name	ensembl id	chromosome	start	end	svm	randomForest	caret_avNNet	caret_pcr	caret_bayesglm
rno-miR-101b	ENSRNOG00000035532	1	254503393	254503489	x	x	x	x
rno-miR-107	ENSRNOG00000035639	1	260347511	260347597		x		x
rno-miR-125a-5p	ENSRNOG00000035572	1	60624485	60624569	x	x		x
rno-miR-139-3p	ENSRNOG00000035601	1	172779847	172779914	x	x	x	x
rno-miR-181a	ENSRNOG00000035630	3	28374769	28374885	x	x	x	x	x
rno-miR-19b	ENSRNOG00000035462	15	103641487	103641573				x
rno-miR-200b	ENSRNOG00000035508	5	176964166	176964260	x	x	x	x	x
rno-miR-200c		n/a	n/a	n/a		x		x
rno-miR-203		n/a	n/a	n/a		x		x
rno-miR-212		n/a	n/a	n/a		x		x
rno-miR-214		n/a	n/a	n/a		x		x
rno-miR-223		n/a	n/a	n/a	x	x	x	x
rno-miR-29a		n/a	n/a	n/a		x		x
rno-miR-29b	ENSRNOG00000049256	1	39612388	39612471	x	x	x	x	x
rno-miR-29c		n/a	n/a	n/a		x		x
rno-miR-322	ENSRNOG00000046692	X	152773468	152773562	x	x	x	x	x
rno-miR-324-3p	ENSRNOG00000035519	10	56366243	56366331		x		x
rno-miR-335		n/a	n/a	n/a	x	x	x	x	x
rno-miR-338		n/a	n/a	n/a		x		x
rno-miR-342-3p	ENSRNOG00000035612	6	141731245	141731343		x		x
rno-miR-34a	ENSRNOG00000035623	5	170733242	170733343	x	x	x	x	x
rno-miR-484	ENSRNOG00000040395	10	27845	27921	x	x	x	x	x
rno-miR-878	ENSRNOG00000041199	X	151278363	151278439	x	x	x	x
rno-miR-92a	ENSRNOG00000035649	15	103641609	103641686		x		x
rno-miR-98	ENSRNOG00000035656	X	21867881	21867988		x		x

## Sheet: protein
analyte id	gene symbol	modification	entrez id	uniprot id	description	svm	randomForest	caret_avNNet	caret_pcr	caret_bayesglm
AVEN	Aven		311299		cell death regulator Aven	x	x	x	x	x
MET	Met		24553		hepatocyte growth factor receptor precursor	x	x	x	x	x
CYP2C8	Cyp2c8					x				x
CYP2E1_2	Cyp2e1		25086	P05182	Cytochrome P450 2E1	x	x	x	x	x
CYP3A4_2	Cyp3a4					x	x	x	x	x
DUSP4	Dusp4		60587		dual specificity protein phosphatase 4	x	x	x	x	x
MAPK3_P_T202_Y204	Mapk3	P_T202_Y204	50689	P21708	Mitogen-activated protein kinase 3	x	x	x	x	x
GSK3B_P_S9	Gsk3b	P_S9	84027	P18266	Glycogen synthase kinase-3 beta	x				x
ERBB2_P_Y877	Erbb2	P_Y877	24337		receptor tyrosine-protein kinase erbB-2 precursor	x	x	x	x	x
HDAC6	Hdac6		100911205		Protein Hdac6	x	x	x	x	x
HIST1H3A_P_S10	Hist1h3a	P_S10				x				x
HIST1H3A_TM_K27	Hist1h3a	TM_K27				x				x
IGFBP1	Igfbp1		25685	P21743	Insulin-like growth factor-binding protein 1	x	x	x	x	x
MAPK8_P_T183_Y185	Mapk8	P_T183_Y185				x	x	x	x	x
MKI67	Mki67									x
CDKN1B	Cdkn1b		83571		cyclin-dependent kinase inhibitor 1B	x	x	x	x	x
RPS6KA1_P_S380	Rps6ka1	P_S380	81771		ribosomal protein S6 kinase alpha-1	x	x	x	x	x
RPS6_1	Rps6				40S ribosomal protein S6	x				x
RPS6_2	Rps6				40S ribosomal protein S6	x	x	x	x	x
RPS6_P_S235_S236	Rps6	P_S235_S236			40S ribosomal protein S6	x	x	x	x	x
SOCS3	Socs3		89829		suppressor of cytokine signaling 3	x	x	x	x	x
STAT3_P_S727	Stat3	P_S727	25125	P52631	Signal transducer and activator of transcription 3	x	x	x	x	x
MAP3K7_P_S412	Map3k7	P_S412	313121	P0C8E4	Mitogen-activated protein kinase kinase kinase 7	x		x		x

## Sheet: PE
pathway	database	pathway id	description	svm	randomForest	caret_avNNet	caret_pcr	caret_bayesglm
BIOLOGICAL_OXIDATIONS	REACTOME	REACT_13433	Genes involved in Biological oxidations	x	x	x	x	x
INTERFERON_ALPHA_BETA_SIGNALING	REACTOME	REACT_25162	Genes involved in Interferon alpha/beta signaling	x	x	x	x	x
ETHANOL_OXIDATION	REACTOME	REACT_34	Genes involved in Ethanol oxidation	x	x	x	x	x
CYTOKINE_SIGNALING_IN_IMMUNE_SYSTEM	REACTOME	REACT_75790	Genes involved in Cytokine Signaling in Immune system	x	x	x	x	x
INTERFERON_SIGNALING	REACTOME	REACT_25229	Genes involved in Interferon Signaling	x	x	x	x	x
REGULATION_OF_IFNA_SIGNALING	REACTOME	REACT_25216	Genes involved in Regulation of IFNA signaling	x	x	x	x	x
PHASE1_FUNCTIONALIZATION_OF_COMPOUNDS	REACTOME	REACT_13705	Genes involved in Phase 1 - Functionalization of compounds	x	x	x	x	x
RETINOL_METABOLISM	KEGG	hsa00830	Retinol metabolism	x	x	x	x	x
GLUTATHIONE_METABOLISM	KEGG	hsa00480	Glutathione metabolism	x	x	x	x	x
GLUTATHIONE_CONJUGATION	REACTOME	REACT_6926	Genes involved in Glutathione conjugation	x	x	x	x	x
METABOLISM_OF_XENOBIOTICS_BY_CYTOCHROME_P450	KEGG	hsa00980	Metabolism of xenobiotics by cytochrome P450	x	x	x	x	x
ANTIVIRAL_MECHANISM_BY_IFN_STIMULATED_GENES	REACTOME	REACT_115676	Genes involved in Antiviral mechanism by IFN-stimulated genes	x	x	x	x	x
DRUG_METABOLISM_CYTOCHROME_P450	KEGG	hsa00982	Drug metabolism - cytochrome P450	x	x	x	x	x
G1_PHASE	REACTOME	REACT_1590	Genes involved in G1 Phase	x	x	x	x	x
PHASE_II_CONJUGATION	REACTOME	REACT_6959	Genes involved in Phase II conjugation		x	x	x
GROWTH_HORMONE_RECEPTOR_SIGNALING	REACTOME	REACT_111133	Genes involved in Growth hormone receptor signaling		x	x	x	x
PS1_PATHWAY	BIOCARTA	190	Presenilin action in Notch and Wnt signaling		x	x	x
DORSO_VENTRAL_AXIS_FORMATION	KEGG	hsa04320	Dorso-ventral axis formation		x	x	x
SMALL_CELL_LUNG_CANCER	KEGG	hsa05222	Small cell lung cancer		x	x	x
P53_SIGNALING_PATHWAY	KEGG	hsa04115	p53 signaling pathway		x	x	x
DNA_REPLICATION	REACTOME	REACT_383	Genes involved in DNA Replication		x	x	x
PROSTATE_CANCER	KEGG	hsa05215	Prostate cancer		x	x	x
NOTCH_SIGNALING_PATHWAY	KEGG	hsa04330	Notch signaling pathway		x	x	x
MTORC1_MEDIATED_SIGNALLING	REACTOME	REACT_6964	Genes involved in mTORC1-mediated signalling			x
MITOTIC_G1_G1_S_PHASES	REACTOME	REACT_21267	Genes involved in Mitotic G1-G1/S phases			x

## Sheet: MI
platform 1	id 1	platform 2	id 2	gene symbol	description	svm	randomForest	caret_avNNet	caret_pcr	caret_bayesglm
mRNA	1367632_AT	protein	GLUL	Glul	Glutamine synthetase	x	x	x	x	x
mRNA	1368146_AT	miRNA	RNO_MIR_200B	Dusp1	Dual specificity protein phosphatase 1	x	x	x	x	x
mRNA	1367573_AT	protein	RPS6_P_S235_S236	Rps6	40S ribosomal protein S6	x	x	x	x	x
mRNA	1370830_AT	protein	EGFR_P_Y1068	Egfr	epidermal growth factor receptor precursor	x	x	x	x	x
mRNA	1373093_AT	miRNA	RNO_MIR_200B	Errfi1		x	x	x	x	x
mRNA	1386917_AT	miRNA	RNO_MIR_96	Pc	Pyruvate carboxylase, mitochondrial	x	x	x	x	x
mRNA	1387892_AT	miRNA	RNO_MIR_200B	Tubb5	Tubulin beta-5 chain	x	x	x	x	x
mRNA	1374647_AT	miRNA	RNO_MIR_200B	Rsbn1	round spermatid basic protein 1	x	x	x	x
mRNA	1390028_AT	miRNA	RNO_MIR_200B	Dyrk2	dual specificity tyrosine-phosphorylation-regulated kinase 2	x	x	x	x
mRNA	1368160_AT	protein	IGFBP1	Igfbp1	Insulin-like growth factor-binding protein 1	x	x	x	x
mRNA	1368146_AT	miRNA	RNO_MIR_429	Dusp1	Dual specificity protein phosphatase 1	x	x	x	x
mRNA	1370287_A_AT	miRNA	RNO_MIR_96	Tpm1		x	x	x	x
mRNA	1373773_AT	miRNA	RNO_MIR_96	Gpm6a	Neuronal membrane glycoprotein M6-a	x	x	x	x
mRNA	1373093_AT	miRNA	RNO_MIR_429	Errfi1		x	x	x	x
mRNA	1367601_AT	miRNA	RNO_MIR_200B	Cited2	cbp/p300-interacting transactivator 2	x	x	x	x
mRNA	1374473_AT	miRNA	RNO_MIR_29B	Ppp1r15b	protein phosphatase 1 regulatory subunit 15B	x	x	x	x
mRNA	1399036_AT	miRNA	RNO_MIR_200B	Usp47	ubiquitin specific peptidase 47	x	x	x	x
mRNA	1388937_AT	miRNA	RNO_MIR_29B	Rnf19a	E3 ubiquitin-protein ligase RNF19A	x	x	x	x
mRNA	1388453_AT	miRNA	RNO_MIR_96	Myadm	myeloid-associated differentiation marker	x	x	x	x
mRNA	1387892_AT	miRNA	RNO_MIR_429	Tubb5	Tubulin beta-5 chain	x	x	x	x
mRNA	1386870_AT	protein	GLUL	Glul	Glutamine synthetase	x	x	x	x
miRNA	RNO_MIR_200C	protein	RPS6KB1	Rps6kb1	Ribosomal protein S6 kinase beta-1	x	x	x	x
mRNA	1367802_AT	miRNA	RNO_MIR_195	Sgk1	Serine/threonine-protein kinase Sgk1	x	x	x	x
mRNA	1367573_AT	protein	RPS6_2	Rps6	40S ribosomal protein S6	x	x	x	x
mRNA	1373807_AT	miRNA	RNO_MIR_200C	Vegfa	Vascular endothelial growth factor A		x	x	x
